# Supplementary material for: Growth of single-crystalline SnO2nanocubes via a hydrothermal route
Source: Royal Society of Chemistry journal article supplement (doi:10.1039/b914721g), 2009-09-25
Supplement: b914721g.pdf [file b914721g.pdf]

## Supplementary Information

**Fig. S1** TEM of the samples prepared under different pH values. (a) pH=3, (b) pH=7, (c) pH=12.

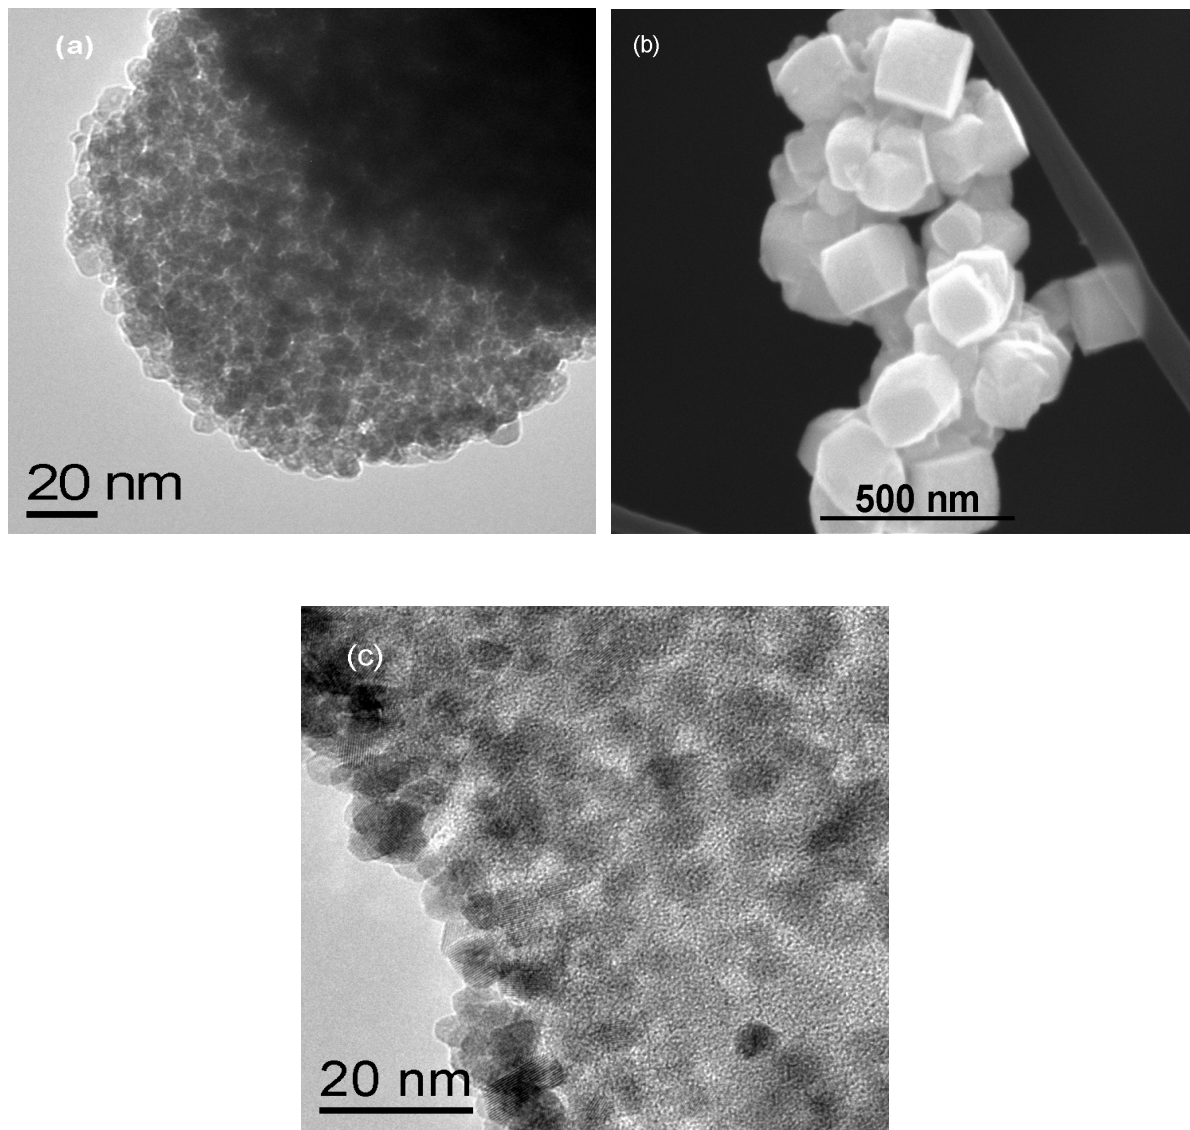

5

10

15

20

**Fig. S2** Particle sizes distribution of SnO<sub>2</sub>. (a) pH=3, (b) pH=12.

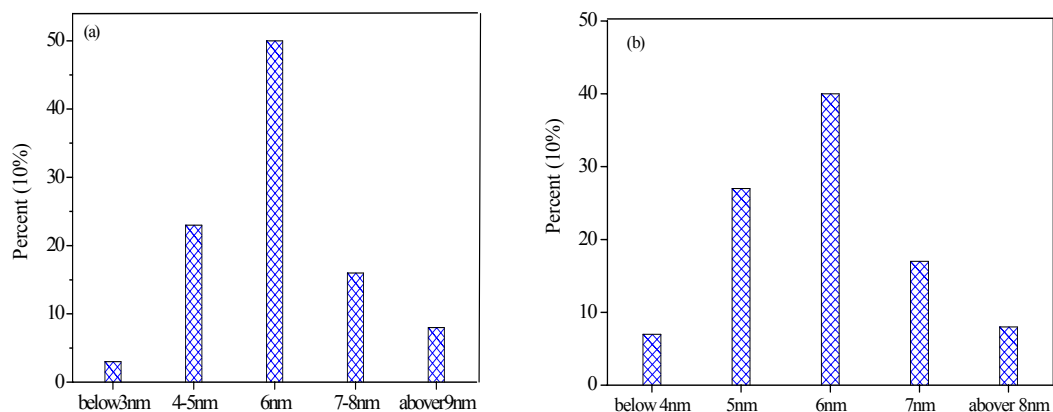

**Fig. S3** TEM images of nanocubes and nano- particles  
25

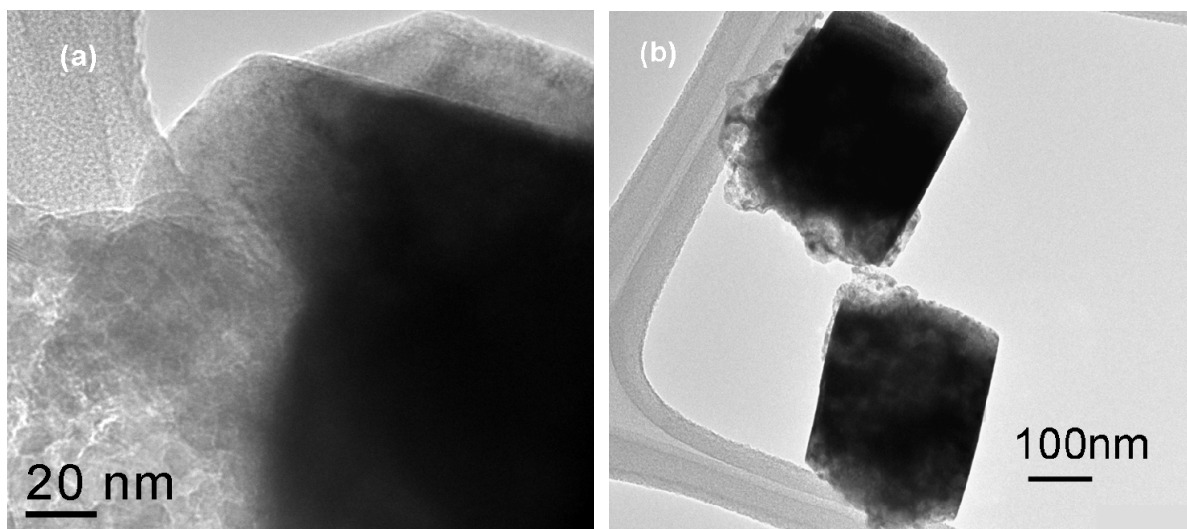

30 **Fig. S4** TEM image of samples prepared under pH =7 without addition of (NH<sub>4</sub>)<sub>2</sub>S<sub>2</sub>O<sub>8</sub>.

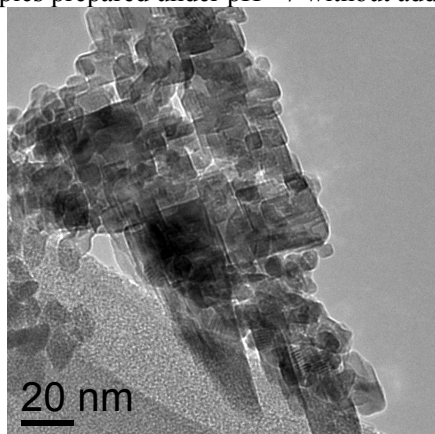

*Instrumentation procedures:*

Powder X-ray diffraction data were recorded by using a Bruker D8 Advance X-ray diffractometer with Cu K $\alpha$ 1 35 irradiation ( $\lambda=1.5406 \text{ \AA}$ ). The selective area electron diffraction and transmission electron microscopy (TEM) images were recorded on a CM120 microscope (120 kV). A trace amount of sample was suspended in ethanol solution, followed by sonication for 10 minutes. Carbon-coated copper grids were used as the sample holders. High resolution transmission electron microscopy (HRTEM) images were recorded on a Tecnai F20 microscope (200 kV) coupled with an energy-dispersive X-ray (EDX, Oxford Instrument) spectrometer. Samples were deposited on thin amorphous 40 carbon films supported by copper grids from ultrasonically processed ethanol solutions of the products.
